# Supplementary material for: Stabilisation of a paramagnetic BH4−-bridged dinickel(ii) complex by a macrodinucleating hexaaza-dithiophenolate ligand
Source: Royal Society of Chemistry journal article supplement (doi:10.1039/b512744k), 2005-11-23
Supplement: b512744k.pdf [file b512744k.pdf]

## Stabilisation of a paramagnetic $\text{BH}_4^-$ -bridged dinickel(II) complex by a macrodinucleating hexaaza-dithiophenolate ligand

Yves Journaux,\* Vasile Lozan, Julia Hausmann, and Berthold Kersting\*

### Supporting Information

**Preparation of the compounds.** Unless otherwise noted the preparations of the metal complexes were carried out under an argon atmosphere using Schlenk techniques. Compound  $\mathbf{1}\cdot\text{ClO}_4$  was prepared as described in the literature (B. Kersting, G. Steinfeld, *Chem. Commun.* 2001, 1376). All compounds are hygroscopic and crystallize with solvent molecules of crystallization (see, for example, the crystal structure of  $\mathbf{3}\cdot\text{BPh}_4\cdot 2\text{CH}_3\text{CN}$ ), but the compounds slowly lose their solvent molecules of crystallization upon standing in air. This is why the observed microanalytical data do not always fit exactly with the calculated values (for the solvent-free compounds).

**Caution!** *Perchlorate salts of transition metal complexes are hazardous and may explode. Only small quantities should be prepared and great care taken.*

**Preparation of  $[(\text{L})\text{Ni}^{\text{II}}_2(\mu\text{-ClO}_4)]\text{ClO}_4$  ( $2\cdot\text{ClO}_4$ ).** To a solution of  $[(\text{L})\text{Ni}^{\text{II}}_2(\mu\text{-Cl})]\text{ClO}_4$  ( $\mathbf{1}\cdot\text{ClO}_4$ ) (184 mg, 0.200 mmol) in MeCN (50 mL) was added solid  $\text{Pb}(\text{ClO}_4)_2$  (44.7 mg, 0.110 mmol). The reaction mixture was stirred for 2 h before  $\text{PbCl}_2$  was removed by filtration. To the dark yellow filtrate was added a solution of  $\text{LiClO}_4\cdot 3\text{H}_2\text{O}$  (321 mg, 2.00 mol) in EtOH (100 mL). The solution was concentrated *in vacuo* to afford a dark green precipitate which was isolated by filtration and dried in air. Yield: 148 mg (75 %). M.p. 308–309 °C (decomp.). IR (KBr)  $\nu / \text{cm}^{-1} = 3443(\text{s}) \text{ br}, 3045(\text{w}), 3024(\text{w}), 2992(\text{w}), 2958(\text{s}), 2900(\text{w}), 2866(\text{s}),$

2815(w), 1489(w), 1462(s), 1426(w), 1395(m), 1377(w), 1363(m), 1345(vw), 1326(w), 1310(m), 1293(w), 1262(m), 1236(m), 1200(w), 1170(m), 1156(s), 1111(vs) [ $\nu_3(\mu\text{-ClO}_4^-)$ ], 1100(vs) [ $\nu_3(\text{ClO}_4^-)$ ], 1019(m) [ $\nu_4(\mu\text{-ClO}_4^-)$ ], 1000(w), 981(w), 911(m), 932(m), 895(w), 882(m), 824(s), 818(s), 808(w), 754(w), 624(s), 603(w), 564(w), 544(w), 533(w), 494(w), 418(w). UV/vis (MeCN):  $\lambda_{\text{max}} / \text{nm} (\epsilon / \text{M}^{-1} \text{cm}^{-1}) = 578 (129), 1066 (86)$ . Elemental analysis (%) calcd. for  $\text{C}_{38}\text{H}_{64}\text{Cl}_2\text{N}_6\text{Ni}_2\text{O}_8\text{S}_2 \cdot \text{EtOH} \cdot \text{H}_2\text{O}$  ( $M = 985.37 + 64.08 \text{ g mol}^{-1}$ ): C 45.78, H 6.92, N 8.01, S 6.11; found C 46.06, H 6.82, N 8.06, S. 6.00.

**[(L)Ni<sup>II</sup><sub>2</sub>( $\mu\text{-BH}_4$ )](BPh<sub>4</sub>) (3·BPh<sub>4</sub>)**. To a solution of **2**·ClO<sub>4</sub> (220 mg, 0.223 mmol) in MeCN (25 mL) was added a solution of N<sup>n</sup>Bu<sub>4</sub>BH<sub>4</sub> (100 mg, 0.387 mmol) in MeCN (2 mL). The reaction mixture was stirred for 30 minutes during which time the colour turned from yellow to pale green. Solid LiClO<sub>4</sub>·3H<sub>2</sub>O (20 mg) was added. The solution was concentrated to *ca.* 5–7 mL. The resulting green solid of **3**·ClO<sub>4</sub> was filtered quickly and redissolved in 30 mL MeCN. Solid NaBPh<sub>4</sub> 342 mg (1.00 mmol) was added. The solution was filtered and concentrated to *ca.* 15 mL. The solution was kept at room temperature for 24 h. The resulting green crystals were filtered and dried in air. The compound can be handled in air for *ca.* 1–2 h without noticeable decomposition, but for long term storage it should be stored under an argon atmosphere. Yield: 136 mg (54 %). M.p. 208–210 °C (decomp). IR (KBr):  $\nu / \text{cm}^{-1} = 3053(\text{m}), 3030(\text{m}), 2997(\text{m}), 2979(\text{sh}), 2962(\text{s}), 2953(\text{sh}), 2899(\text{m}), 2861(\text{m}), 2838(\text{sh}), 2809(\text{w}), 2390(\text{m}) (\nu\text{BH}_4^-), 2360(\text{s}) (\nu\text{BH}_4^-), 2153(\text{s}) (\nu\text{BH}_4^-), 2071(\text{s}) (\nu\text{BH}_4^-), 1602(\text{w}), 1579(\text{w}), 1460(\text{s}), 1424(\text{m}), 1393(\text{m}), 1375(\text{w}), 1361(\text{w}), 1350(\text{vw}), 1327(\text{vw}), 1304(\text{w}), 1293(\text{w}), 1263(\text{w}), 1235(\text{w}), 1200(\text{w}), 1169(\text{w}), 1153(\text{m}), 1131(\text{w}), 1110(\text{w}), 1091(\text{m}), 1075(\text{s}), 1056(\text{s}), 1036(\text{s}), 997(\text{m}), 982(\text{m}), 931(\text{m}), 910(\text{m}), 881(\text{m}), 843(\text{m}), 823(\text{s}), 808(\text{shm}), 748(\text{sh}), 733(\text{vs}), 704(\text{vs}) \text{cm}^{-1} (\nu\text{BPh}_4^-), 627(\text{m}), 612(\text{s})$ . UV/Vis (MeCN):  $\lambda_{\text{max}} / \text{nm} (\epsilon / \text{M}^{-1} \text{cm}^{-1}) = 650 (43), 1074 (77)$ . Elemental analysis (%) calcd. (%) for

$C_{62}H_{88}B_2N_6Ni_2S_2 \cdot MeCN$  ( $M = 1120.54 + 41.05 \text{ g mol}^{-1}$ ): C 66.18, H 7.90, N 8.44, S 5.52;  
found: C 65.73, H 7.73, N 8.13, S 5.72.

**Reaction of 3·BPh<sub>4</sub> with protic reagents (H<sub>2</sub>O, HCl, HClO<sub>4</sub>, HCO<sub>2</sub>H).** General procedure:

To a solution of the borohydrido-bridged complex 3·BPh<sub>4</sub> (112 mg, 0.100 mmol) in MeCN (30 mL) was added a solution of 0.15 mmol of the respective reagent in MeCN (2 mL). The reaction mixtures were stirred for 2 to 3 days under a protective argon atmosphere. The solutions were then evaporated to dryness and redissolved in MeCN (10 mL). Small amounts of an insoluble material were removed by filtration. Upon slow evaporation of the resulting clear solutions, the products precipitated as microcrystalline solids.

**[(L)Ni<sup>II</sup><sub>2</sub>(μ-Cl)](BPh<sub>4</sub>) (1·BPh<sub>4</sub>):** Yield: 87 mg (76 %). IR (KBr):  $\nu / \text{cm}^{-1} = 733, 705$  (BPh<sub>4</sub><sup>-</sup>). UV/Vis (MeCN):  $\lambda_{\text{max}} / \text{nm} (\epsilon / \text{M}^{-1} \text{cm}^{-1}) = 658 (41), 919 (65), 998 (67)$ ; Elemental analysis (%) calcd. for  $C_{62}H_{84}BClN_6Ni_2S_2$  ( $M = 1141.51 \text{ g mol}^{-1}$ ): C 65.26, H 7.42, N 7.36, S 5.62; found: C 65.12, H 7.32, N 7.14, S 5.33. These data are identical with those of 1·BPh<sub>4</sub> reported earlier (B. Kersting, G. Steinfeld, *Chem. Commun.* 2001, 1376).

**[(L)Ni<sup>II</sup><sub>2</sub>(μ-OH)](BPh<sub>4</sub>) (4·BPh<sub>4</sub>):** Yield: 73 mg (65 %). IR (KBr)  $\nu / \text{cm}^{-1} = 3546(\text{m})$  (OH), 733, 705 (BPh<sub>4</sub><sup>-</sup>). UV/vis (CH<sub>3</sub>CN)  $\lambda_{\text{max}} / \text{nm} (\epsilon / \text{M}^{-1} \text{cm}^{-1}) = 655 (52), 1056 (40)$ . Elemental analysis (%) calcd. for  $C_{62}H_{85}BN_6Ni_2OS_2 \cdot H_2O$  ( $M = 1122.71 + 18.02$ ): C 65.28, H 7.69, N 7.37, S 5.62; found: C 65.24, H 7.44, N 7.38, S 5.68. These data are identical with those of 4·BPh<sub>4</sub> reported earlier (B. Kersting, G. Steinfeld, *Chem. Commun.* 2001, 1376).

**[(L)Ni<sup>II</sup><sub>2</sub>(μ-O<sub>2</sub>CH)](BPh<sub>4</sub>) (5·BPh<sub>4</sub>):** Yield: 106 mg (92 %). IR (KBr)  $\nu / \text{cm}^{-1} = 1602$  [ $\nu_{\text{as}}(\text{CO}_2)$ ], 1424  $\text{cm}^{-1}$  [ $\nu_{\text{s}}(\text{CO}_2)$ ]. UV/Vis (MeCN):  $\lambda_{\text{max}} / (\epsilon / \text{M}^{-1} \text{cm}^{-1}) = 653 (35), 1112 (73)$ .

Elemental analysis (%) calcd. for  $C_{63}H_{85}BN_6Ni_2O_2S_2$  ( $M = 1150.72 \text{ g mol}^{-1}$ ): C 65.76, H 7.45, N 7.30, S 5.57; found: C 65.23, H 7.41, N 7.02, S 5.34. This compound was additionally characterized by X-ray crystal structure analysis (see below).

**Complex  $5 \cdot BPh_4$  can also be prepared by the reaction of  $3 \cdot BPh_4$  with  $CO_2$ :** A solution of the borohydrido-bridged complex  $3 \cdot BPh_4$  (112 mg, 0.100 mmol) in MeCN (30 mL) was stirred for 12 h under a  $CO_2$  atmosphere (1 bar). The solution was evaporated to dryness and redissolved in MeCN (10 mL). Upon slow evaporation, the formate-complex  $5 \cdot BPh_4$  precipitated as a microcrystalline green solid. Yield: 110 mg (95 %). The analytical data are identical with those of  $5 \cdot BPh_4$  prepared by the reaction described above.

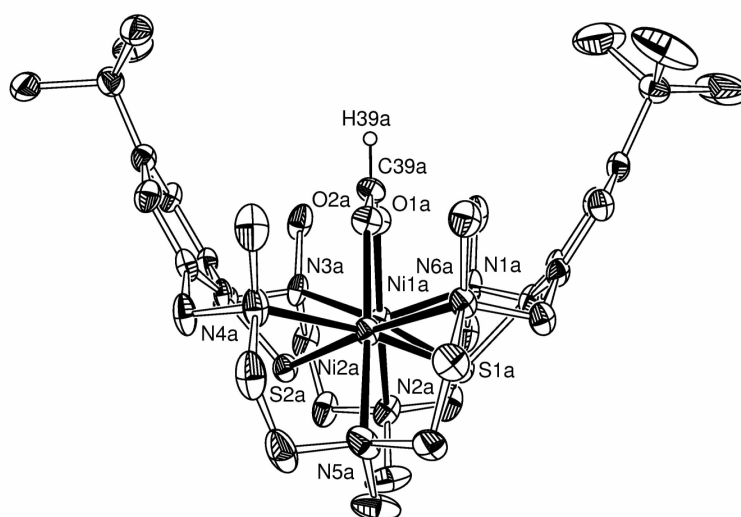

**Fig. S1** ORTEP representation of the structure of the formate complex **5** with thermal ellipsoids drawn at the 50 % probability level. Only one molecule (A) of the two crystallographically independent molecules within the asymmetric unit is shown. *tert*-Butyl groups and hydrogen atoms, except that of the formate coligand, have been omitted for clarity. Selected bond lengths [ $\text{\AA}$ ] for molecule A [molecule B]: Ni(1A)–O(1A) 1.992(4) [2.000(4)], Ni(1A)–N(1A) 2.266(6) [2.238(6)], Ni(1A)–N(2A) 2.146(5) [2.167(5)], Ni(1A)–N(3A) 2.255(5) [2.313(6)], Ni(1A)–S(1A) 2.477(2) [2.501(2)], Ni(1A)–S(2A) 2.497(2) [2.466(2)], Ni(2A)–O(2A) 1.996(4) [2.000(4)], Ni(2A)–N(4A) 2.320(6) [2.250(6)],

Ni(2A)–N(5A) 2.136(6) [2.135(6)], Ni(2A)–N(6A) 2.243(6) [2.319(6)], Ni(2A)–S(1A) 2.478(2) [2.479(2)], Ni(2A)–S(2A) 2.487(2) [2.488(2)], Ni···Ni 3.481(1) [3.479(1)].

**Magnetic susceptibility measurements.** Temperature-dependent magnetic susceptibility measurements of a powdered solid sample of **5**·BPh<sub>4</sub> were carried out on a SQUID magnetometer (MPMS Quantum Design) over the temperature range 2.0–300 K. The magnetic field applied was 0.2 T. The observed susceptibility data were corrected for the underlying diamagnetism by using Pascals constants.

In order to determine the magnitude of the exchange interaction the  $\chi_M T$  versus  $T$  experimental data were analysed by using the spin Hamiltonian [Eq. (1)] for dinuclear complexes, which includes two additional terms to account for Zeeman splitting and single-ion zero-field interactions. The introduction of a  $D$  parameter is appropriate since for nickel(II) ions, the non-cubic components of the ligand field may act on the  $S = 1$  ground state to produce a zero-field splitting which may be of the same order of magnitude as  $J$ .

$$H = -2J S_1 \cdot S_2 + D(S_{z1}^2 + S_{z2}^2 - 4/3) + g\beta(S_1 + S_2)B \quad (1)$$

In order to reduce the number of the variables the  $D$  and  $g$  values were considered to be identical for the two nickel(II) ions. The resulting Hamiltonian was diagonalised numerically to obtain the magnetic susceptibility which was used to fit the  $\chi_M T$  magnetic data for the nickel(II) compounds. An excellent fit was obtained with  $J = +27 \text{ cm}^{-1}$ ,  $g = 2.09$  and  $D = 4.3 \text{ cm}^{-1}$  with an agreement factor  $R = 5.94 \times 10^{-3}$ . The solid line in Figure 2 (see main text) represents this best fit. It should be noted that the inclusion of the  $D$  parameter improved the low-temperature fit significantly, but it represents by no means an accurate value (temperature dependent magnetic susceptibility measurement are not very appropriate for the determination

of the sign and magnitude of  $D$ ).

**Table S1.** Magnetic susceptibility data for  $[(L)Ni^{II}_2(\mu-BH_4)](BPh_4)$  (**3**· $BPh_4$ ) as a function of the temperature: Sample = 0.02184 [g];  $M_r$  = 1120.54 [g/mol], diamagnetic correction =  $-0.0056027$  [ $cm^3/mol$ ],  $H$  = 0.2 Tesla.

| $T / K$ | $\chi_M T_{exp.} / cm^3 K mol^{-1}$ | $\chi_M T_{calcd.} / cm^3 K mol^{-1}$ |
|---------|-------------------------------------|---------------------------------------|
| 294.83  | 2.6930                              | 2.6915                                |
| 289.71  | 2.6981                              | 2.6945                                |
| 284.67  | 2.7011                              | 2.6976                                |
| 279.63  | 2.6995                              | 2.7008                                |
| 274.64  | 2.7067                              | 2.7042                                |
| 269.64  | 2.7103                              | 2.7078                                |
| 264.64  | 2.7135                              | 2.7116                                |
| 259.66  | 2.7179                              | 2.7156                                |
| 254.65  | 2.7197                              | 2.7198                                |
| 249.66  | 2.7220                              | 2.7242                                |
| 244.65  | 2.7272                              | 2.7289                                |
| 239.66  | 2.7311                              | 2.7338                                |
| 234.66  | 2.7375                              | 2.7390                                |
| 229.73  | 2.7450                              | 2.7443                                |
| 224.72  | 2.7498                              | 2.7500                                |
| 219.71  | 2.7589                              | 2.7561                                |
| 214.71  | 2.7642                              | 2.7624                                |
| 209.73  | 2.7708                              | 2.7690                                |
| 204.76  | 2.7790                              | 2.7759                                |
| 199.77  | 2.7840                              | 2.7832                                |
| 194.80  | 2.7918                              | 2.7909                                |
| 189.80  | 2.8006                              | 2.7990                                |
| 184.82  | 2.8090                              | 2.8075                                |
| 179.84  | 2.8195                              | 2.8164                                |
| 174.84  | 2.8280                              | 2.8258                                |
| 169.86  | 2.8360                              | 2.8357                                |

|        |        |        |
|--------|--------|--------|
| 164.86 | 2.8457 | 2.8461 |
| 159.88 | 2.8590 | 2.8570 |
| 154.89 | 2.8699 | 2.8684 |
| 149.91 | 2.8810 | 2.8805 |
| 144.92 | 2.8934 | 2.8931 |
| 139.93 | 2.9090 | 2.9064 |
| 134.94 | 2.9221 | 2.9204 |
| 129.96 | 2.9364 | 2.9350 |
| 125.02 | 2.9403 | 2.9502 |
| 119.98 | 2.9678 | 2.9665 |
| 114.98 | 2.9846 | 2.9833 |
| 109.98 | 3.0037 | 3.0009 |
| 104.99 | 3.0223 | 3.0193 |
| 100.00 | 3.0425 | 3.0383 |
| 95.990 | 3.0512 | 3.0541 |
| 93.970 | 3.0618 | 3.0623 |
| 91.980 | 3.0711 | 3.0704 |
| 89.990 | 3.0797 | 3.0786 |
| 88.000 | 3.0870 | 3.0868 |
| 86.000 | 3.0958 | 3.0952 |
| 84.010 | 3.1037 | 3.1037 |
| 82.020 | 3.1121 | 3.1122 |
| 80.020 | 3.1188 | 3.1207 |
| 78.030 | 3.1269 | 3.1293 |
| 76.020 | 3.1353 | 3.1380 |
| 74.040 | 3.1446 | 3.1466 |
| 72.040 | 3.1530 | 3.1552 |
| 70.040 | 3.1610 | 3.1638 |
| 68.040 | 3.1700 | 3.1724 |
| 66.050 | 3.1780 | 3.1809 |
| 64.050 | 3.1853 | 3.1892 |
| 62.030 | 3.1877 | 3.1976 |
| 60.030 | 3.1959 | 3.2057 |
| 58.230 | 3.2155 | 3.2128 |

|        |        |        |
|--------|--------|--------|
| 56.250 | 3.2253 | 3.2205 |
| 54.250 | 3.2322 | 3.2279 |
| 52.250 | 3.2391 | 3.2351 |
| 50.240 | 3.2465 | 3.2419 |
| 48.240 | 3.2542 | 3.2483 |
| 46.230 | 3.2620 | 3.2544 |
| 44.220 | 3.2685 | 3.2599 |
| 42.220 | 3.2736 | 3.2650 |
| 40.210 | 3.2782 | 3.2695 |
| 38.200 | 3.2826 | 3.2734 |
| 36.200 | 3.2853 | 3.2766 |
| 34.200 | 3.2877 | 3.2792 |
| 32.200 | 3.2891 | 3.2812 |
| 30.200 | 3.2902 | 3.2824 |
| 28.200 | 3.2913 | 3.2830 |
| 26.200 | 3.2903 | 3.2828 |
| 24.200 | 3.2889 | 3.2820 |
| 22.200 | 3.2860 | 3.2805 |
| 20.200 | 3.2826 | 3.2782 |
| 19.200 | 3.2805 | 3.2768 |
| 18.200 | 3.2773 | 3.2751 |
| 17.200 | 3.2750 | 3.2732 |
| 16.200 | 3.2727 | 3.2711 |
| 15.200 | 3.2701 | 3.2684 |
| 14.200 | 3.2672 | 3.2654 |
| 13.200 | 3.2638 | 3.2618 |
| 12.200 | 3.2608 | 3.2574 |
| 10.950 | 3.2336 | 3.2505 |
| 10.000 | 3.2372 | 3.2436 |
| 9.0100 | 3.2232 | 3.2345 |
| 8.0100 | 3.2072 | 3.2221 |
| 7.0000 | 3.1859 | 3.2047 |
| 6.0000 | 3.1501 | 3.1795 |
| 5.0000 | 3.1029 | 3.1406 |



|        |        |        |
|--------|--------|--------|
| 4.0000 | 3.0649 | 3.0761 |
| 3.0000 | 2.9632 | 2.9580 |
| 2.0000 | 2.7360 | 2.7066 |
